# Supplementary material for: Heteroelements in polyoxometalates: a study on the influence of different group 15 elements on polyoxometalate formation
Source: Royal Society of Chemistry journal article supplement (doi:10.1039/d3dt03883a), 2023-12-04
Supplement: d3dt03883a1.pdf [file d3dt03883a1.pdf]

Electronic supporting information for

**Heteroelements in polyoxometalates: a study on the  
influence of different group 15 elements on  
polyoxometalate formation**

Jan-Christian Raabe<sup>1</sup>, Froze Jameel<sup>2</sup>, Matthias Stein<sup>2</sup>, Jakob Albert<sup>1</sup> and Maximilian J. Poller\*<sup>1</sup>

<sup>1</sup>Institute for Technical and Macromolecular Chemistry, Universität Hamburg, Bundesstraße 45, 20146 Hamburg, Germany

<sup>2</sup>Max Planck Institute for Dynamics of Complex Technical Systems, Molecular Simulations and Design Group, Sandtorstrasse 1, 39106, Magdeburg, Germany

\*Corresponding Author

# Content

|          |                                                     |           |
|----------|-----------------------------------------------------|-----------|
| <b>1</b> | <b>Experimental details .....</b>                   | <b>3</b>  |
| 1.1      | Chemicals .....                                     | 3         |
| 1.2      | Synthetic procedures.....                           | 3         |
| 1.3      | Characterization.....                               | 4         |
| 1.3.1    | Compositional analysis .....                        | 4         |
| 1.3.2    | Vibrational Spectroscopy .....                      | 10        |
| 1.3.3    | Nuclear magnetic resonance (NMR) spectroscopy ..... | 10        |
| 1.3.4    | Ultraviolet visible spectroscopy (UV-Vis) .....     | 12        |
| 1.3.5    | Crystallography .....                               | 17        |
| <b>2</b> | <b>Computational data .....</b>                     | <b>19</b> |
| 2.1      | General information.....                            | 19        |
| 2.2      | Cartesian coordinates.....                          | 19        |
| <b>3</b> | <b>Literature.....</b>                              | <b>26</b> |

# 1 Experimental Details

## 1.1 Chemicals

All chemicals were purchased from the following suppliers:

- Sodium tungstate dihydrate: VWR chemicals
- Nitric acid: was obtained from Merck as 65 % solution in water and was further diluted with deionized water to a concentration of 4 M.
- Phosphoric acid: was purchased as a 85 % solution in water from Grüssing, which was further diluted with demineralized water to a final concentration of 25 %.
- Arsenic(III) oxide: was purchased from Honeywell (ReagentPlus 99.0 %)
- Potassium hexahydroxoantimonate(V): Merck
- Hydrochloric acid: VWR chemicals as a 37 % solution in water
- Hydrogen peroxide: VWR chemicals as a 30 % solution in water
- Deionized water was always used as solvent

## 1.2 Synthetic procedures

Preparing the As(V) solution: Arsenic(III) oxide was added to a mixture of water (30 mL) and a 30 % solution of hydrogen peroxide in water (30 mL). It was refluxed for two hours, yielding an aqueous, colorless solution of arsenic(V) acid in water.

Preparing the Sb(V) solution: potassium hexahydroxo antimonate(V) was added to water (100 mL) and refluxed for one hour, yielding a colorless solution

General experimental procedure: Sodium tungstate dihydrate was dissolved in water (100 mL) or added to the respective As(V)/Sb(V) solution. The start volume of the reaction mixture was always 100 mL of an aqueous solution. For the experiments with the hetero elements N(V) and P(V) a 4 M solution of nitric acid or 25 % phosphoric acid solution in water was added to the tungstate solution. The pH value was adjusted to 5 or 1 using a 37 % solution of hydrochloric acid in water and the solution was concentrated under reduced pressure (85 °C, 200 to 0 mbar) to yield a white powder in the case of the experiments at pH 5 or a yellow powder in the experiments at pH 1 for N(V) and Sb(V). Purification of the POMs was done by our previous published nanofiltration process.<sup>1,2</sup>

Table S1 shows an overview of the precise weights of all precursor compounds:

**Table S1:** Precise weights of all precursor substances used in our experimental procedures.

| No. | Precursor                                            | pH 5 experiments |                  |             | pH 1 experiments |                           |             |
|-----|------------------------------------------------------|------------------|------------------|-------------|------------------|---------------------------|-------------|
|     |                                                      | Mass             | Substance [mmol] | Equivalents | Mass             | Amount of substance [mol] | Equivalents |
| 1   | Na <sub>2</sub> WO <sub>4</sub> · 2 H <sub>2</sub> O | 5.0032 g         | 15.168           | 6.02        | 5.0012 g         | 15.162                    | 6.02        |
|     | 4 M HNO <sub>3</sub>                                 | 0.63 mL          | 2.52             | 1.00        | 0.63 mL          | 2.52                      | 1.00        |
| 2   | Na <sub>2</sub> WO <sub>4</sub> · 2 H <sub>2</sub> O | 5.0017 g         | 15.163           | 5.97        | 5.0040           | 15.170                    | 5.98        |
|     | 25 % H <sub>3</sub> PO <sub>4</sub>                  | 0.9954 g         | 2.5394           | 1.00        | 0.9941           | 2.5361                    | 1.00        |
| 3   | Na <sub>2</sub> WO <sub>4</sub> · 2 H <sub>2</sub> O | 5.0022 g         | 15.165           | 11.97       | 5.0027           | 15.166                    | 12.00       |
|     | As <sub>2</sub> O <sub>3</sub>                       | 0.2506 g         | 1.267            | 1.00        | 0.2499           | 1.236                     | 1.00        |
| 4   | Na <sub>2</sub> WO <sub>4</sub> · 2 H <sub>2</sub> O | 5.0031 g         | 15.168           | 6.00        | 5.0012           | 15.162                    | 6.00        |
|     | K[Sb(OH) <sub>6</sub> ]                              | 0.6644 g         | 2.527            | 1.00        | 0.6643           | 2.527                     | 1.00        |

All precisely measured pH values in our experiments are listed in Table S2:

**Table S2:** pH values in our experiments.

| No. | pH 5 experiments           |                           | pH 1 experiments           |                           |
|-----|----------------------------|---------------------------|----------------------------|---------------------------|
|     | pH value before adjustment | pH value after adjustment | pH value before adjustment | pH value after adjustment |
| 1   | 7.790                      | 5.040                     | 7.866                      | 1.018                     |
| 2   | 7.926                      | 5.066                     | 7.884                      | 0.998                     |
| 3   | 5.829                      | 4.984                     | 5.495                      | 0.953                     |
| 4   | 9.900                      | 5.180                     | 9.124                      | 1.007                     |

### 1.3 Characterization

#### 1.3.1 Compositional analysis

##### Elemental analysis (AAS/ICP-OES):

All samples were analyzed using an ICP-OES-spectrometer for elemental analysis (Fa. Spectro, type ARCOS) for W and P (method ICP-OES). Na, K and Sb were determined with AAS-F (Fa. Thermo, type Solaar S Series), method: F-AAS without HKL). Element As was measured with G-AAS. Nitrate was analyzed with IC.

- Compound  $\text{Na}_8[\text{W}_{12}\text{O}_{40}]$  was dissolved in water (25 mL).
- Compound  $\text{Na}_{12}[\text{P}_4\text{W}_{14}\text{O}_{58}]$  was dissolved in water (5 mL) and nitric acid (0.1 mL) was added. Then it was filled up to a final volume of 25 mL.
- The As(V) containing sample was dissolved in water (25 mL).
- Compound  $\text{Na}_7[\text{SbW}_6\text{O}_{24}]$  was dissolved in water (25 mL).
- The oxides  $\text{WO}_3$  and  $\text{Sb}_2\text{O}_5$  were dissolved in aqua regia invers (5 mL) and hydrofluoric acid (1 mL) was added. Then it was filled up to a final volume of 50 mL.

In our experience, the above described method systematically results in slightly too low values for W, presumably due to partial precipitation of  $\text{WO}_3$  during sample preparation.

#### Thermogravimetric analysis (TGA):

Approximately 20 mg of the sample was weighed into a quart crucible and the change in mass was measured at the following temperature program:

- Tare
- 1 minute waiting time
- Heating to 30 °C with heating rate of 10 K/min
- Stay at 30 °C for 15 minutes
- Heating to 350 °C with a heating rate of 10 K/min
- Stay at 350 °C for 30 minutes
- The sample was then cooled to room temperature

The starting temperature was below 30 °C. During the measurement, a nitrogen flow of 20 mL/min was passed through the instrument. The TGA data show three regions: hygroscopic water (water that comes from the air), lattice water (water from crystal association) and the mass consistency (pure POM without any moisture). The final data were exported as a x/y text document. Using Origin® 2019b the TGA data were plotted.

The results of the ICP-OES analysis for the different compounds are summarized below:

#### **$\text{Na}_8[\text{W}_{12}\text{O}_{40}]$ (hetero element N(V) pH 5):**

**ICP-OES:** Calculated for  $\text{Na}_8[\text{W}_{12}\text{O}_{40}] \cdot 11 \text{H}_2\text{O}$ : 5.697 % Na, 0.000 % K, 68.339 % W. Found for  $\text{Na}_8[\text{W}_{12}\text{O}_{40}] \cdot 9 \text{H}_2\text{O}$ : 6.67 % Na, 0.00 % K, 64.92 % W. Data normalized to tungsten. Na/K/W ratio: 9.9/0/12.

**TGA:** 6.413 % weight loss upon drying, this corresponds to 12 mol lattice water per mol of the POM.

**WO<sub>3</sub> (hetero element N(V) pH 1):**

**ICP-OES:** Calculated for WO<sub>3</sub>: 79.297 % W. Found for WO<sub>3</sub>: 46.23 % W. Nitrate was not determinable, because WO<sub>3</sub> is not soluble in pure water.

The W content deviates because the oxide is contaminated with nitrates.

**Na<sub>12</sub>[P<sub>4</sub>W<sub>14</sub>O<sub>58</sub>] (hetero element P(V) pH 5):**

**ICP-OES:** Calculated for Na<sub>12</sub>[P<sub>4</sub>W<sub>14</sub>O<sub>58</sub>] · 16 H<sub>2</sub>O: 16.585 % Na, 0.000 % K, 2.957 % P, 61.43 % W. Found for Na<sub>12</sub>[P<sub>4</sub>W<sub>14</sub>O<sub>58</sub>] · 16 H<sub>2</sub>O: 0.294 % Na, 0.00986 % K, 2.03 % P, 58.9 % W. Data normalized to tungsten. Na/K/P/W ratio: 0.56/0.01/2.86/14.

The phosphorus content differs due to the loss of PO<sub>4</sub><sup>3-</sup> during nanofiltration.

**TGA:** 6.840 % weight loss upon drying, this corresponds to 16 mol lattice water per mol of the POM.

**Na<sub>3</sub>[PW<sub>12</sub>O<sub>40</sub>] (hetero element P(V) pH 1):**

**ICP-OES:** Calculated for Na<sub>3</sub>[PW<sub>12</sub>O<sub>40</sub>] · 8 H<sub>2</sub>O: 2.232 % Na, 0.000 % K, 1.002 % P, 71.391 % W. Found for Na<sub>3</sub>[PW<sub>12</sub>O<sub>40</sub>] · 8 H<sub>2</sub>O: 10.9 % Na, 0.000736 % K, 1.42 % P, 54.7 % W. Data normalized to tungsten. Na/K/P/W ratio: 19.0/0.0007/1.86/12.

The literature known POM Na<sub>3</sub>[PW<sub>12</sub>O<sub>40</sub>] was not further purified. Therefore, the Na content is increased, which also causes the contents of the other elements to deviate.

**TGA:** 4.524 % weight loss upon drying, this corresponds to 8 mol lattice water per mol of the POM.

**Na<sub>9</sub>[AsW<sub>9</sub>O<sub>34</sub>] (hetero element As(V) pH 5):**

**ICP-OES:** Calculated for Na<sub>9</sub>[AsW<sub>9</sub>O<sub>34</sub>] · 10 H<sub>2</sub>O: 7.777 % Na, 0.000 % K, 2.816 % As, 62.189 % W. Found for Na<sub>9</sub>[AsW<sub>9</sub>O<sub>34</sub>] · 10 H<sub>2</sub>O: 8.52 % Na, 0.00904 % K, 3.07 % As, 58.3 % W. Data normalized to tungsten. Na/K/As/W ratio: 10.5/0.00656/1.16/9.

**TGA:** 6.661 % weight loss upon drying, this corresponds to 10 mol lattice water per mol of the POM.

**Na<sub>9</sub>[AsW<sub>9</sub>O<sub>34</sub>] (hetero element As(V) pH 1):**

**ICP-OES:** Calculated for Na<sub>9</sub>[AsW<sub>9</sub>O<sub>34</sub>] · 11 H<sub>2</sub>O: 7.725 % Na, 0.000 % K, 2.797 % As, 61.771 % W. Found for Na<sub>9</sub>[AsW<sub>9</sub>O<sub>34</sub>] · 11 H<sub>2</sub>O: 6.62 % Na, 0.00584 % K, 2.51 % As, 59.3 % W. Data normalized to tungsten. Na/K/As/W ratio: 8.03/0.004/0.93/9.

**TGA:** 7.605 % weight loss upon drying, this corresponds to 11 mol lattice water per mol of the POM.

**Na<sub>7</sub>[SbW<sub>6</sub>O<sub>24</sub>] (hetero element Sb(V) pH 5):**

**ICP-OES:** Calculated for Na<sub>7</sub>[SbW<sub>6</sub>O<sub>24</sub>] · 14 H<sub>2</sub>O: 7.959 % Na, 0.000 % K, 6.022 % Sb, 54.554 % W. Found for Na<sub>7</sub>[SbW<sub>6</sub>O<sub>24</sub>] · 14 H<sub>2</sub>O: 8.45 % Na, 1.11 % K, 7.18 % Sb, 59.1 % W. Data normalized to tungsten. Na/K/Sb/W ratio: 6.86/0.53/1.10/6.

**TGA:** 12.12 % weight loss upon drying, this corresponds to 14 mol lattice water per mol of the POM.

**WO<sub>3</sub>/Sb<sub>2</sub>O<sub>5</sub> (hetero element Sb(V) pH 1):**

**ICP-OES:** Calculated for WO<sub>3</sub> and for Sb<sub>2</sub>O<sub>5</sub>: 79.297 % W, 75.273. Found for WO<sub>3</sub>/Sb<sub>2</sub>O<sub>5</sub>: 42.65 % W, 13.0 % Sb.

The W/Sb content differs because the product was isolated as a mixture of WO<sub>3</sub> and Sb<sub>2</sub>O<sub>5</sub>.



The stoichiometry of all compounds was verified by ICP-OES analysis and the amount of hydration water was determined using thermogravimetric analysis (TGA) as shown in Table S3.

**Table S3:** ICP-OES elemental analysis and TGA results of the different synthesized compounds in this work.

| Hetero element | Compound                                                           | Synthesized at pH value... | Element ratio <sup>a</sup>                         | Hydration water <sup>b</sup> |
|----------------|--------------------------------------------------------------------|----------------------------|----------------------------------------------------|------------------------------|
| N(V)           | Na <sub>8</sub> [W <sub>12</sub> O <sub>40</sub> ]                 | 5                          | Na/K/NO <sub>3</sub> <sup>-</sup> /W<br>9.9/0/0/12 | 11                           |
|                | WO <sub>3</sub>                                                    | 1                          | W: 46.23 % <sup>c</sup>                            | -                            |
| P(V)           | Na <sub>12</sub> [P <sub>4</sub> W <sub>14</sub> O <sub>58</sub> ] | 5                          | Na/K/P/W<br>0.56/0.01/2.86 <sup>d</sup> /14        | 16                           |
|                | Na <sub>3</sub> [PW <sub>12</sub> O <sub>40</sub> ]                | 1                          | Na/K/P/W<br>19.0/0.0007/1.86/12 <sup>e</sup>       | 8                            |
| As(V)          | Na <sub>9</sub> [AsW <sub>9</sub> O <sub>34</sub> ]                | 5                          | Na/K/As/W<br>10.5/0.007/1.16/9                     | 10                           |
|                | Na <sub>9</sub> [AsW <sub>9</sub> O <sub>34</sub> ]                | 1                          | Na/K/As/W<br>8.03/0.004/0.93/9                     | 11                           |
| Sb(V)          | Na <sub>7</sub> [SbW <sub>6</sub> O <sub>24</sub> ]                | 5                          | Na/K/Sb/W<br>6.86/0.53/1.10/6                      | 14                           |
|                | WO <sub>3</sub> /Sb <sub>2</sub> O <sub>5</sub>                    | 1                          | Sb/W<br>2.76/6                                     | -                            |

<sup>a</sup>Element ratios were determined using ICP-OES analysis.

<sup>b</sup>Hydration water amount was determined by TGA.

<sup>c</sup>NO<sub>3</sub><sup>-</sup> could not be determined because the sample was dissolved in an aqua regia/HF in the microwave. NO<sub>3</sub><sup>-</sup> determination is only possible in a purely aqueous medium.

<sup>d</sup>The anion [P<sub>4</sub>W<sub>14</sub>O<sub>58</sub>]<sup>12-</sup> appears to dissociate more strongly in aqueous solution (presumably due to greater instability compared to the other compounds), so that portions of the phosphorus are lost in subsequent purification steps. The identity of the compound was confirmed, especially with IR, Raman, and single crystal structure analysis.

<sup>e</sup>The anion [PW<sub>12</sub>O<sub>40</sub>]<sup>3-</sup> is already known in the literature and was therefore not further purified.

After our dialysis purification<sup>1,2</sup> for the anion [P<sub>4</sub>W<sub>14</sub>O<sub>58</sub>]<sup>12-</sup>, significant amounts of P were found in the permeate fraction (Table S4), explaining the lowered stoichiometry of 2.86. This indicates a stronger dissociation and thus higher instability of this anion in aqueous solution.

**Table S4:** Elemental analysis of the permeate fraction after purifying compound Na<sub>12</sub>[P<sub>4</sub>W<sub>14</sub>O<sub>58</sub>].

| Element             | Na    | K       | P     | W      |
|---------------------|-------|---------|-------|--------|
| Concentration [g/L] | 1.345 | 0.00046 | 0.154 | 0.0551 |

### 1.3.2 Vibrational Spectroscopy

#### ATR-FT-IR spectroscopy:

All IR spectra were measured in attenuated total reflection (ATR) measurement mode on a QATR™-S single-reflection ATR (with a diamond prism) from Shimadzu. From the raw data obtained, the baseline was corrected, and the peaks were determined manually. The IR data were then exported as an x/y text document and plotted in Origin®2019b.

#### Raman spectroscopy:

All Raman spectra were measured on a SENTERRA Raman microscope from Bruker Optik GmbH. The aperture was set to 50 x 1000 µm. A 20 objective was used on the microscope. The excitation laser has a wavelength of 785 nm and the measurement range used was between 75 cm<sup>-1</sup> and 1525 cm<sup>-1</sup>. The integration time was 16 seconds, the number of scans was 8 and the Raman laser power was 10 mW. All data were exported as .dpt file and plotted in Origin®2019b.

### 1.3.3 Nuclear magnetic resonance (NMR) spectroscopy

All <sup>31</sup>P spectra were measured with a Time Domain Data Sizes (TD) of 32 K, the Number of Scans (NS) were set to 2k (= 2048), the Transmitter Frequency Offset for Channel F1 (O1) and the Spectral Width (SW) were -1 and 40 ppm. The Delay D1 was set to 1 s. NMR analysis was done using MestReNova®. All data were exported into .csv data and plotted in Origin®2019b.

The <sup>31</sup>P-NMR data of compound Na<sub>12</sub>[P<sub>4</sub>W<sub>14</sub>O<sub>58</sub>] and Na<sub>3</sub>[PW<sub>12</sub>O<sub>40</sub>] are shown in Figure S1 and S2.

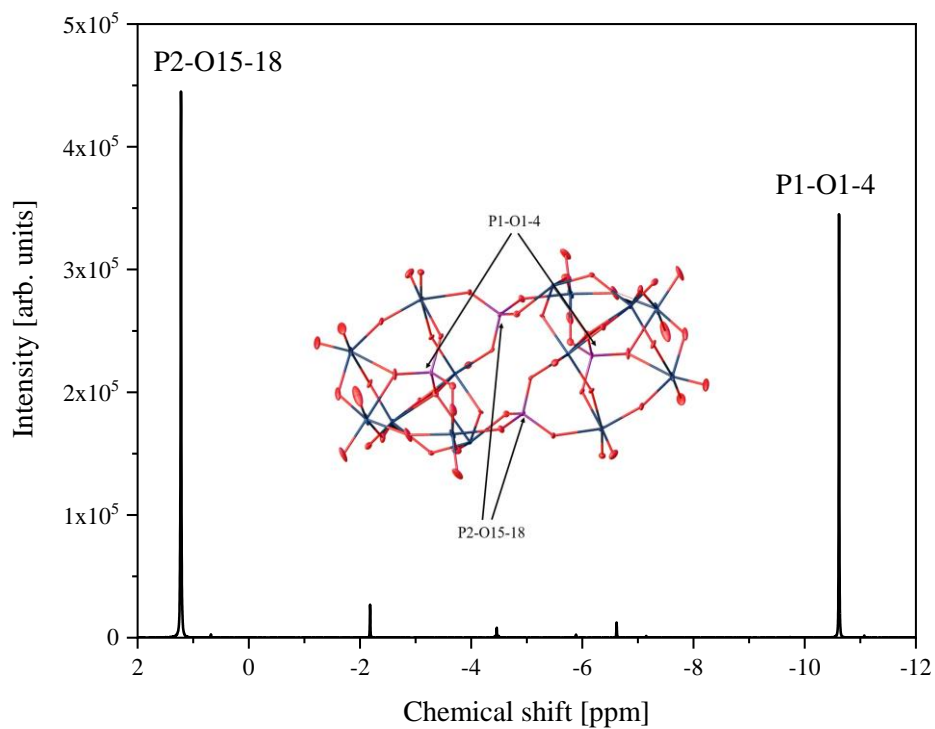

**Figure S1:**  $^{31}\text{P}$ -NMR of  $\text{Na}_{12}[\text{P}_4\text{W}_{14}\text{O}_{58}]$  in a mixture of 0.7 mL water (pH 5) and 0.07 mL acetone- $d_6$ . The spectrum was measured at 242.9 MHz, 85 %  $\text{H}_3\text{PO}_4$  was used as external standard.

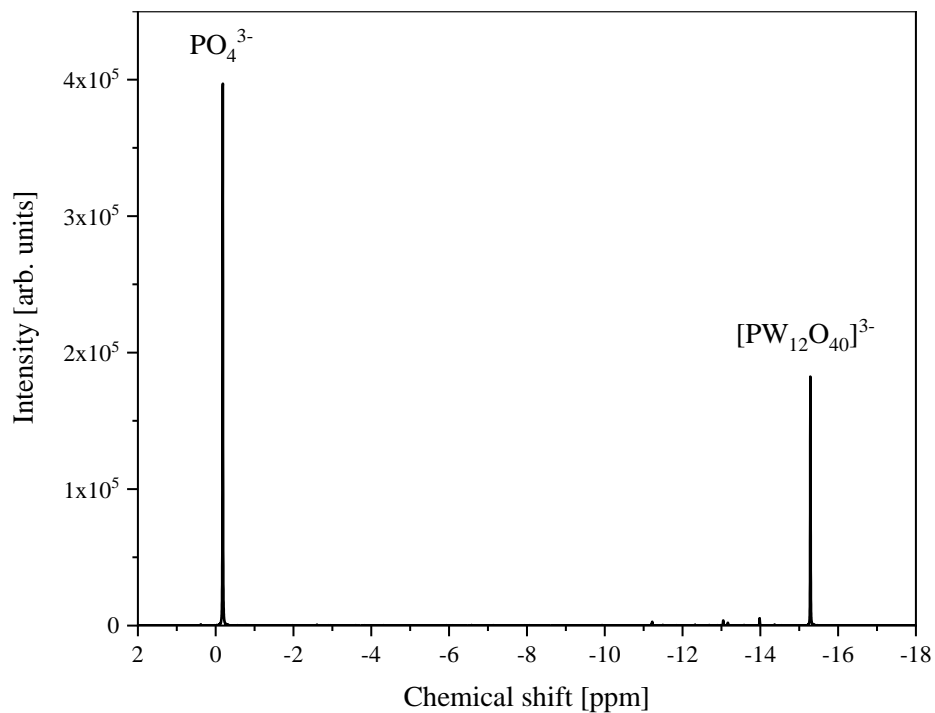

**Figure S2:**  $^{31}\text{P}$ -NMR of  $\text{Na}_3[\text{PW}_{12}\text{O}_{40}]$  in a mixture of 0.7 mL water (pH 5) and 0.07 mL acetone- $d_6$ . The spectrum was measured at 242.9 MHz, 85 %  $\text{H}_3\text{PO}_4$  was used as external standard.

### 1.3.4 Ultraviolet visible spectroscopy (UV-Vis)

**Stock solution:** The respective POM (10 mg) was dissolved in deionized water (10 mL) → 1 g/L.

**Spectra measurement:** All UV-Vis spectra were measured with a Cary 60 UV-Vis spectrometer (Agilent Technologies) in a Quartz cuvette of 3 mL (QS). Measurements were done using the Cary WinUV software. Range: 200 nm and 800 nm. The extinction was measured in the slow measurement mode. Data were then exported as a .csv data set and plotted in Origin®2019b.

For measurement samples were prepared as follows: The stock solution (80  $\mu$ L) was filled into the cuvette and water (2920  $\mu$ L) was added to reach the final measuring volume of 3 mL.

The UV-Vis data of all compounds investigated in this work are shown in Figure S3 at a concentration of 26.7 mg/L. All spectra show the ligand-to-metal-charge-transfer bands (LMCT) of W(VI), which are listed in Table 5.<sup>3,4</sup> The LMCT positions were found in the range of 247 to 259 nm.

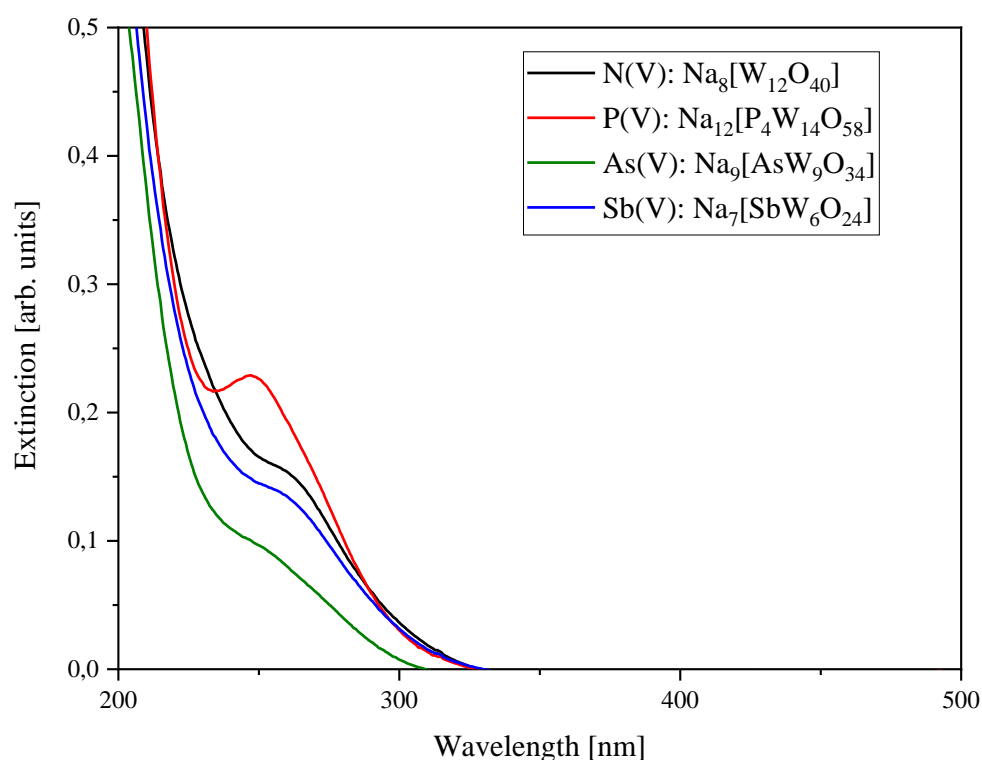

**Figure S3:** UV-Vis spectra of all POMs (synthesized at pH 5) investigated in this work.

**Table S5:** LMCT positions for W(VI) of all POMs investigated in this work.

| Hetero element involved | N(V)                                               | P(V)                                                               | As(V)                                               | Sb(V)                                               |
|-------------------------|----------------------------------------------------|--------------------------------------------------------------------|-----------------------------------------------------|-----------------------------------------------------|
| Compound                | Na <sub>8</sub> [W <sub>12</sub> O <sub>40</sub> ] | Na <sub>12</sub> [P <sub>4</sub> W <sub>14</sub> O <sub>58</sub> ] | Na <sub>9</sub> [AsW <sub>9</sub> O <sub>34</sub> ] | Na <sub>7</sub> [SbW <sub>6</sub> O <sub>24</sub> ] |
| LMCT band [nm]          | 259.0                                              | 247.0                                                              | 247.0                                               | 255.0                                               |

**Extinction coefficients:** Extinction coefficients were determined using the software Cary concentrations. Five calibration standards were prepared from the stock solution (1 g/L) with a final volume of 3 mL for the cuvette:

- 20  $\mu$ L stock solution + 2980  $\mu$ L deionized water
- 40  $\mu$ L stock solution + 2960  $\mu$ L deionized water
- 50  $\mu$ L stock solution + 2950  $\mu$ L deionized water
- 60  $\mu$ L stock solution + 2940  $\mu$ L deionized water
- 80  $\mu$ L stock solution + 2920  $\mu$ L deionized water

Extinction coefficients were calculated according to equations 1 to 4:

Lambert-Beer's law (equation 1):

$$Abs = \varepsilon_{\lambda} \cdot d \cdot c \cdot M^{-1} \quad (1)$$

*Abs*: Absorption

$\varepsilon_{\lambda}$ : extinction coefficient (wavelength  $\lambda$  dependant) [ $l \text{ mol}^{-1} \text{ cm}^{-1}$ ]

*d*: Cuvette layer thickness (1 cm) [cm]

*c*: concentration [g/L]

*M*: molar mass [g/mol]

Calibration line (equation 2):

$$Abs = a \cdot c + b \quad (2)$$

*a*: slope

*b*: Axis intercept

Determining the extinction coefficient:

$$a = \varepsilon_{\lambda} \cdot d \cdot M^1 \quad (3)$$

$$\varepsilon_{\lambda} = \frac{a \cdot M}{d} \quad (4)$$

The LMCT peak maxima were analyzed according to the Lambert Beer's law and therefore the extinction coefficients were calculated and listed in Table S6.

**Table S6:** Extinction coefficients determined according to the Lambert Beer's law.

| Hetero element involved                                            | N(V)                                               | P(V)                                                               | As(V)                                               | Sb(V)                                               |
|--------------------------------------------------------------------|----------------------------------------------------|--------------------------------------------------------------------|-----------------------------------------------------|-----------------------------------------------------|
| <b>Compound</b>                                                    | Na <sub>8</sub> [W <sub>12</sub> O <sub>40</sub> ] | Na <sub>12</sub> [P <sub>4</sub> W <sub>14</sub> O <sub>58</sub> ] | Na <sub>9</sub> [AsW <sub>9</sub> O <sub>34</sub> ] | Na <sub>7</sub> [SbW <sub>6</sub> O <sub>24</sub> ] |
| <b>Extinction coefficient [L mol<sup>-1</sup> cm<sup>-1</sup>]</b> | 2.1576 · 10 <sup>4</sup>                           | 3.5899 · 10 <sup>4</sup>                                           | 0.9380 · 10 <sup>4</sup>                            | 1.0151 · 10 <sup>4</sup>                            |

As expected, the POM anion [P<sub>4</sub>W<sub>14</sub>O<sub>58</sub>]<sup>12-</sup> shows the highest extinction coefficient due to the highest amount of W(VI) per molecule.

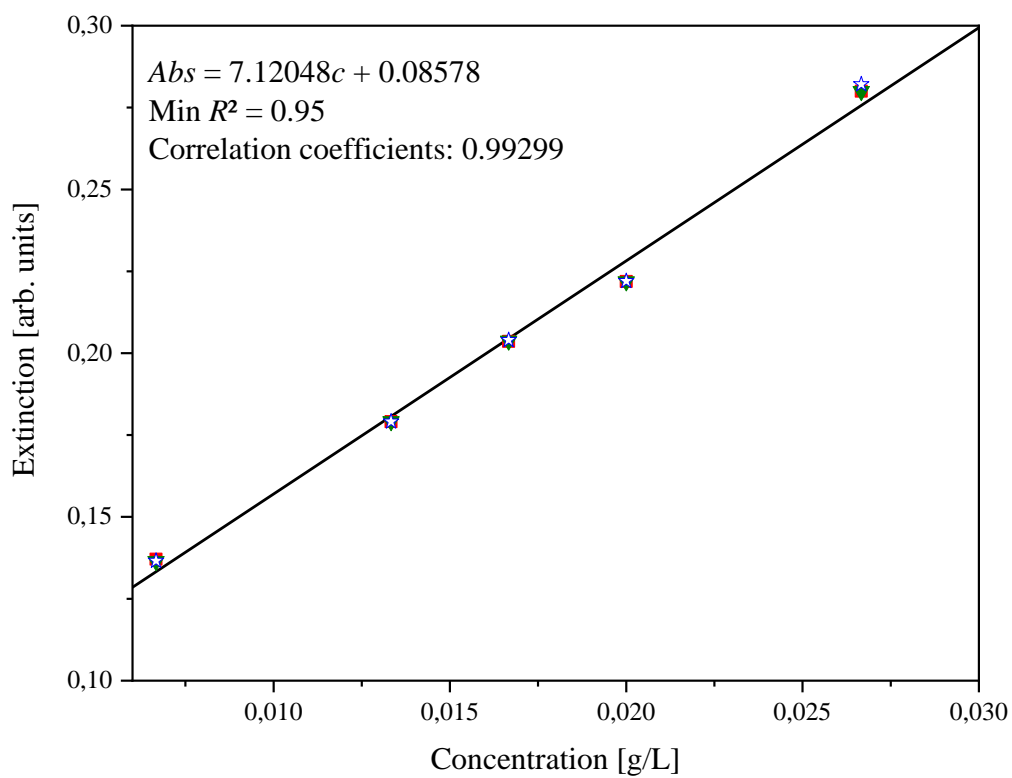

**Figure S4:** Calibration line for determining the extinction coefficient of the W(VI) LMCT for  $[W_{12}O_{40}]^{8-}$ .

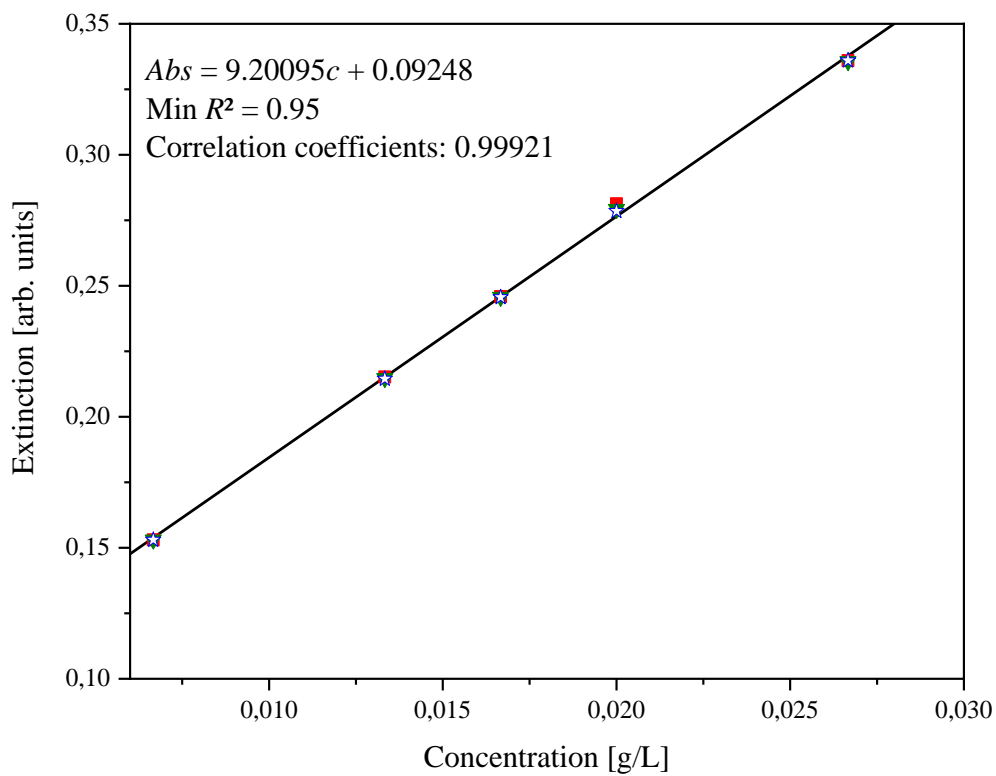

**Figure S5:** Calibration line for determining the extinction coefficient of the W(VI) LMCT for  $[P_4W_{14}O_{58}]^{12-}$ .

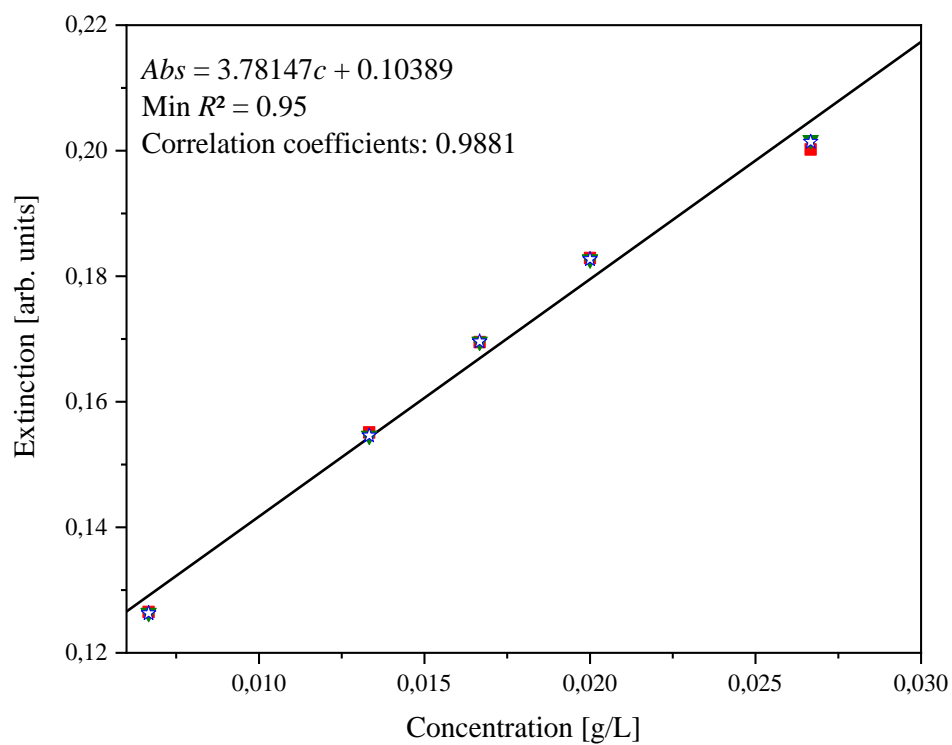

**Figure S6:** Calibration line for determining the extinction coefficient of the W(VI) LMCT for  $[AsW_9O_{34}]^{9-}$ .

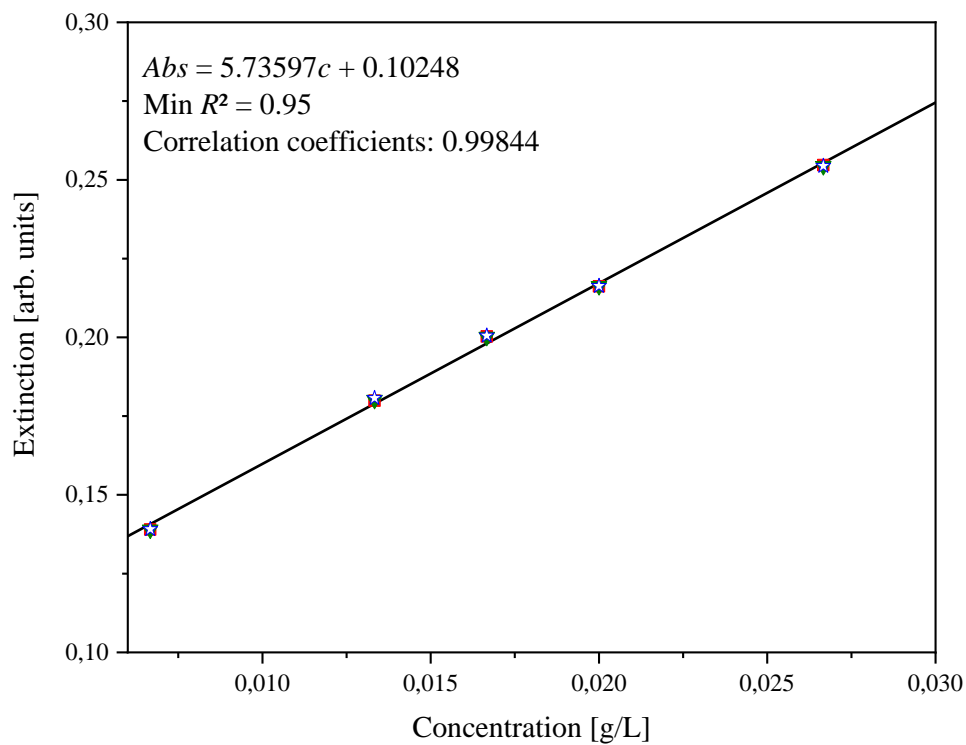



**Figure S7:** Calibration line for determining the extinction coefficient of the W(VI) LMCT for  $[\text{SbW}_6\text{O}_{24}]^{7-}$ .

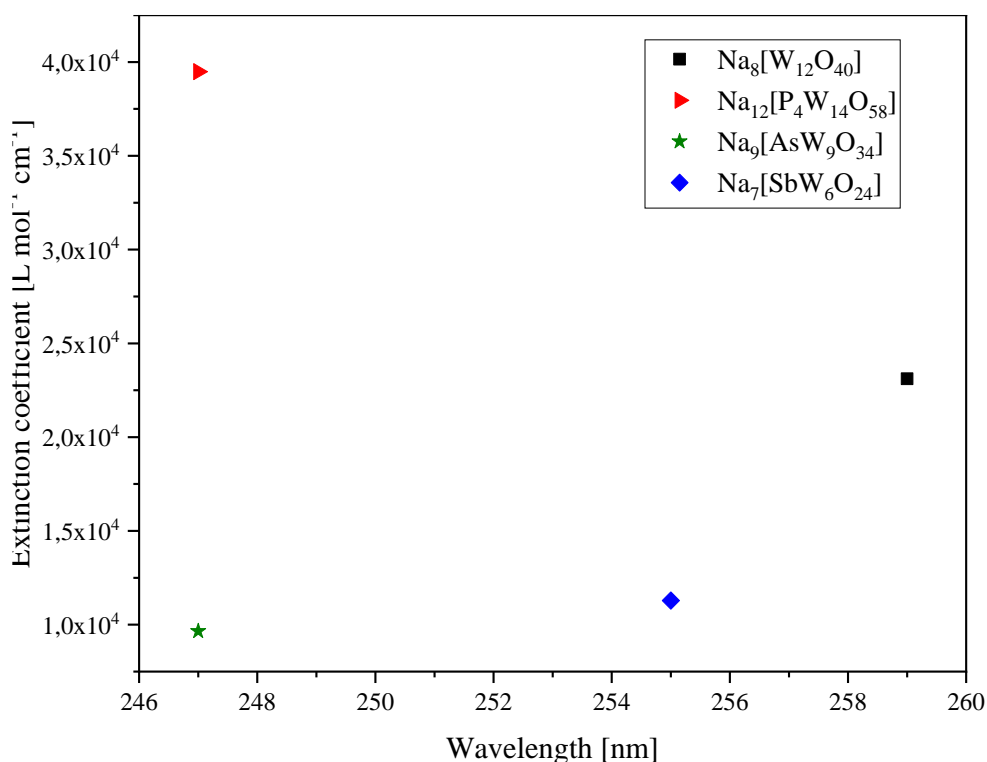

**Figure S8:** Plot of the extinction coefficient vs. wavelength for each POM.

### 1.3.5 Crystallography

The crystallographic data set comprising the anion  $[\text{W}_{12}\text{O}_{40}]^{8-}$  (deposition number: 2293850) showed some problems during the refinement. Refining the model as  $\text{Na}_8[\text{W}_{12}\text{O}_{40}]$  led to a residual electron density with a maximum and minimum peak of 5.6 and -11.5, respectively. This effect might be caused by several factors, including the difficulty to account correctly the absorption effect of the heavy atoms.<sup>5</sup> However, it turned out that the applied absorption correction scheme (either without face indexing, *i.e.*, empirical, or with face indexing, *i.e.*, numerical sphere, numerical Gaussian grid or analytical according to Clark & Reid<sup>6</sup>) had only a very minor influence on the residual electron/hole density values. Another attempt to fix the problem was the application of the new algorithm "NoSpherA2" as implemented in Olex2 where so-called "non-spherical form factors" are calculated on a quantum mechanical basis.<sup>7-</sup><sup>10</sup> However, this approach did not lead to success, since the wavefunction could not be calculated because the self-consistent field calculation did not converge for unknown reasons. As the Fourier difference map showed a pronounced shashlik-like pattern with too little and too much electron density around the W atoms in alternating fashion (see Figure S9) a

corresponding attempt to model a disorder of the  $\text{WO}_6$  octahedra was undertaken. Although this reduced drastically the electron density difference values with a maximum and minimum value of only 3.8 and -3.4, respectively, and the  $R_1$  value could be reduced further down to 3.45 %, some other issues arose as, for instance, atoms with non-positive definite (NPD) values of the displacement parameters and unrealistic W-O bond lengths. Therefore, we believe that the structure altogether is better represented by the non-disordered model. The most important thing is, that due to the low  $R_1$  value of 4.74 %, there is no doubt about the constitution of the  $[\text{W}_{12}\text{O}_{40}]^{8-}$  anion and the identity of the paratungstate B, respectively.

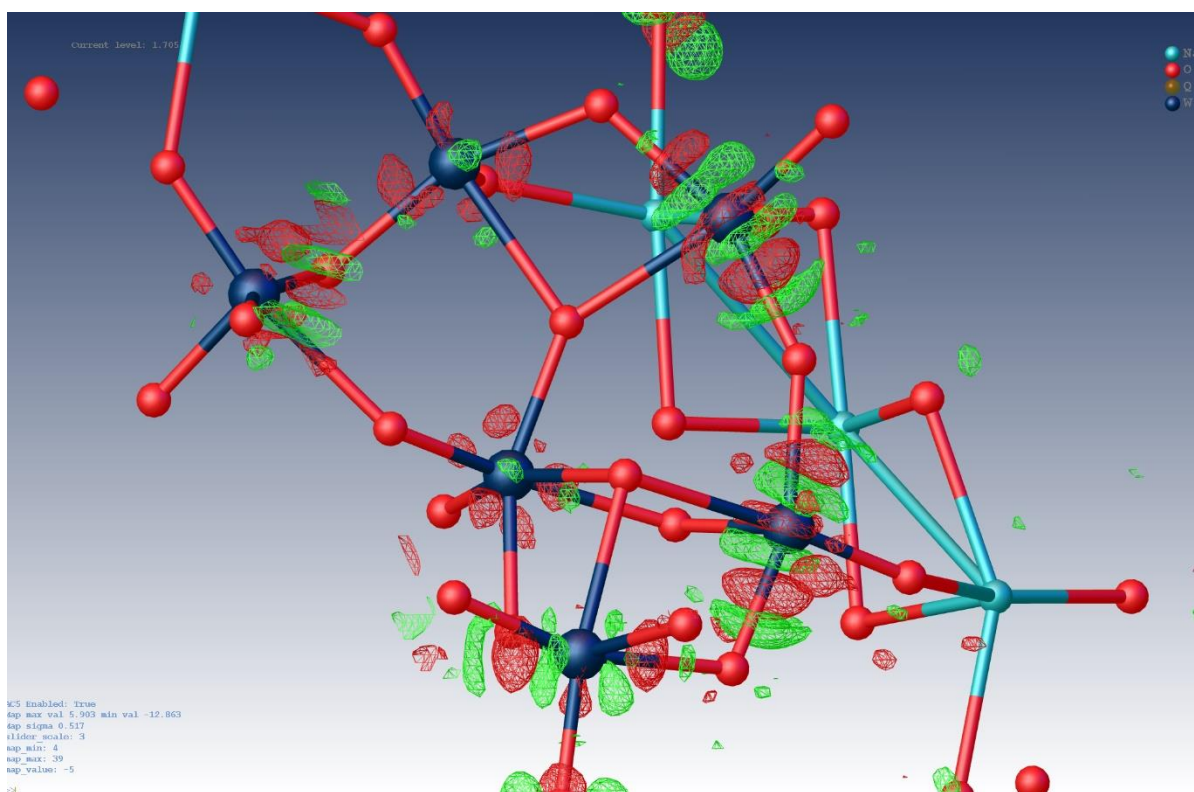

**Figure S9:** Fourier difference map of  $\text{Na}_8[\text{W}_{12}\text{O}_{40}]$  showing a shashlik-like pattern of too high and too low electron density around the W atoms.

## 2 Computational data

### 2.1 General information

All DFT calculations were performed using TURBOMOLE V 7.5.1 2021.<sup>11</sup> Structures were optimized using the PBE0 hybrid functional<sup>12</sup> using an Ahlrichs' triple- $\zeta$  valence polarization (def2-TZVP) basis set for all atoms.<sup>13</sup> Geometry optimizations were carried out in gas phase with tight SCF convergence ( $10^{-8}$  h) criteria using a fine m4 grid. The resolution-of-identity approximation was applied using auxiliary def2-TZVP basis sets to approximate the Coulomb potentials. For each optimized structure, second derivatives were calculated with the same settings used for geometry optimizations. All optimized structures were characterized as minima by absence of any negative frequency. Zero point vibrational energies and thermodynamic corrections were calculated without any scaling factor. The molecular volume of the optimized structures was calculated using MoloVol. The thermodynamic corrections for all species were evaluated at 298 K and 1 bar within the rigid-rotor harmonic-oscillator approximation. The implicit COSMO<sup>14</sup> (Conductor like Solvation MOdel) was used to incorporate solvation effects.

#### Keggin Heteroelement Substitution

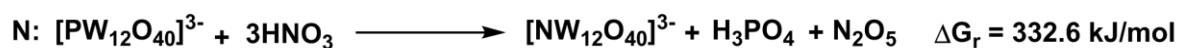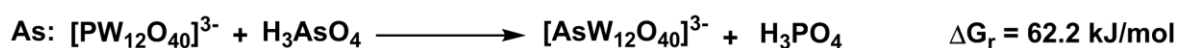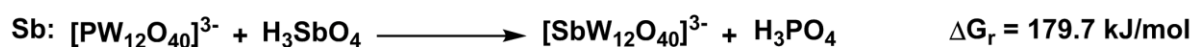

#### Anderson-Evans Heteroelement Substitution

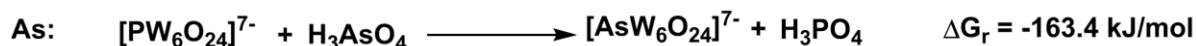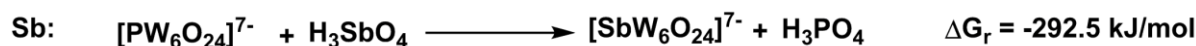

**Figure S10:** The Gibbs energies of formation from isodesmic reactions of the Keggin and Anderson-Evans complexes with their respective acids.

### 2.2 Cartesian coordinates

Cartesian coordinates of the optimized structures in Å

[NW<sub>12</sub>O<sub>40</sub>]<sup>3-</sup>

O 0.0828607 1.2718738 -3.6874977  
O 1.9090346 3.3026590 -0.5793297  
O -0.0702244 5.2934969 -0.0172464  
O 0.7594919 -3.4953634 1.7905944  
O 2.1020083 -0.1178495 2.8850769  
O 3.5571844 -0.1061275 -0.3224547  
W -1.5610863 1.7300634 -2.7529147  
O -0.1403746 -1.4150532 3.3047504  
W 1.4505968 -0.0683339 -3.3407307  
O 2.4102472 1.2277792 -2.2664785  
O -2.4070272 -2.8117048 -3.9572162  
O -1.1992073 -0.0778373 0.7045928  
W 1.6305185 1.7543414 2.7000795  
O -2.7206629 1.2505901 2.4965996  
W -1.5592069 -0.0932155 3.2916163  
O 0.7290356 -1.2269595 0.3264326  
O 2.3914395 -1.3938660 -2.2855004  
O -0.2574342 -0.0696717 -1.3679853  
O -0.1210995 1.2068305 3.3218640  
O -2.8349956 -1.8161490 -1.2940173  
O 2.2992216 -2.7246336 4.0822709  
O 2.3352074 2.4669614 4.1211675  
W 3.1016968 1.7664894 -0.5381587  
O -0.6144932 -3.1369512 -1.7300733  
O 3.0610654 1.9547432 1.3967842  
W 0.0330338 -3.7270042 0.0003287  
O -4.5532481 -2.8309000 0.7695888  
O 2.3486861 -0.0646067 -4.8293179  
W 0.0879328 3.5632223 0.0530029  
O 4.5933382 -2.7078862 -0.9776954  
O 4.6327901 2.4879746 -0.9394493  
W -3.1044817 1.7178383 0.6470592  
O -2.3629193 2.7450256 -3.9159121  
O -0.1505893 -5.4536191 -0.0933302  
O 3.0299180 -2.1831098 1.3665182  
O -1.6527000 3.0035141 0.6999533  
O -2.1900036 -0.0410772 -3.2596477  
W -1.5880930 -1.8284108 -2.7790914  
O 1.8574339 -3.4853553 -0.6287880  
W 3.0737137 -1.9684843 -0.5654808  
O 0.0631184 -1.3837660 -3.7064528  
O -2.0939648 -0.0999576 4.9462957  
O -2.8086973 1.7152633 -1.2687218  
O -3.8919511 -0.0550936 0.5015462  
O -4.5129127 2.7250879 0.8112031  
O 0.8103679 3.2956131 1.8394081  
O -2.7415896 -1.4064968 2.4779626  
W 1.6029341 -1.9800536 2.6733685  
O 0.7457962 1.0482286 0.3430006

O -0.5666615 3.0065889 -1.6859051  
O -1.6979822 -3.1488963 0.6569127  
N 0.0062092 -0.0817100 0.0019885  
W -3.1304302 -1.8417582 0.6210101

---

[PW<sub>12</sub>O<sub>40</sub>]<sup>3-</sup>

O 0.0771320 1.2620087 -3.7004608  
O 1.9172699 3.3137574 -0.5640737  
O -0.1375929 5.1685010 -0.0429903  
O 0.7764572 -3.5053256 1.7855021  
O 2.0357197 -0.1160201 2.7095065  
O 3.3812266 -0.1049282 -0.2517354  
W -1.5176554 1.6689207 -2.7197447  
O -0.1638670 -1.3904775 3.1217433  
W 1.3933575 -0.0681712 -3.2932843  
O 2.2653519 1.2048424 -2.1682458  
O -2.3695528 -2.7996558 -3.8148797  
O -1.3183344 -0.0769550 0.7735681  
W 1.6073969 1.7426162 2.6231786  
O -2.7384238 1.2387780 2.5008883  
W -1.5610064 -0.0923859 3.2156795  
O 0.7987269 -1.3398184 0.3570135  
O 2.2469096 -1.3695827 -2.1870758  
O -0.2848815 -0.0683501 -1.5025788  
O -0.1443182 1.1852548 3.1403468  
O -2.7145879 -1.6781221 -1.2388733  
O 2.2210259 -2.6117137 4.0315396  
O 2.2583163 2.3578327 4.0677096  
W 3.0285137 1.7541911 -0.5068849  
O -0.5345745 -2.9807899 -1.6685544  
O 3.0595934 1.9740510 1.3959262  
W 0.0633367 -3.6560671 0.0142086  
O -4.4232760 -2.8164544 0.7116066  
O 2.3522337 -0.0649470 -4.6968751  
W 0.1173580 3.4914734 0.0661439  
O 4.5061028 -2.5920304 -0.9997451  
O 4.5434189 2.3747815 -0.9643588  
W -3.0512542 1.6558081 0.6578610  
O -2.3264566 2.7278063 -3.7752033  
O -0.2164199 -5.3273678 -0.1192698  
O 3.0280064 -2.2024360 1.3656429  
O -1.5546271 2.8400009 0.7187381  
O -2.1734149 -0.0412104 -3.2811810  
W -1.5441393 -1.7688941 -2.7445368  
O 1.8657502 -3.4959222 -0.6137878  
W 3.0007556 -1.9548185 -0.5336142  
O 0.0573300 -1.3726765 -3.7190414  
O -1.9856886 -0.1010446 4.8614644  
O -2.6898317 1.5741528 -1.2155541

|   |            |            |            |
|---|------------|------------|------------|
| O | -3.9006332 | -0.0556804 | 0.5224667  |
| O | -4.3816914 | 2.7096191  | 0.7507529  |
| O | 0.8278539  | 3.3046360  | 1.8350184  |
| O | -2.7581809 | -1.3953544 | 2.4818713  |
| W | 1.5791276  | -1.9664957 | 2.5961544  |
| O | 0.8175047  | 1.1598609  | 0.3752015  |
| O | -0.4898691 | 2.8491915  | -1.6263874 |
| O | -1.5987443 | -2.9891826 | 0.6766918  |
| P | 0.0031587  | -0.0812813 | 0.0007304  |
| W | -3.0770676 | -1.7816420 | 0.6333617  |

**[AsW<sub>12</sub>O<sub>40</sub>]<sup>3-</sup>**

|   |            |            |            |
|---|------------|------------|------------|
| O | 0.0740751  | 1.2692053  | -3.7368183 |
| O | 1.9363986  | 3.3451042  | -0.5627859 |
| O | -0.1563571 | 5.1686420  | -0.0514677 |
| O | 0.7898208  | -3.5372470 | 1.7989742  |
| O | 2.0268631  | -0.1157625 | 2.6759745  |
| O | 3.3494499  | -0.1048966 | -0.2359695 |
| W | -1.5167277 | 1.6631645  | -2.7325358 |
| O | -0.1690297 | -1.3879819 | 3.0871136  |
| W | 1.3841337  | -0.0680088 | -3.3036284 |
| O | 2.2347806  | 1.2026259  | -2.1489173 |
| O | -2.3761620 | -2.8143399 | -3.8017444 |
| O | -1.4297282 | -0.0764622 | 0.8387233  |
| W | 1.6139678  | 1.7542745  | 2.6201319  |
| O | -2.7674250 | 1.2459557  | 2.5222642  |
| W | -1.5748371 | -0.0922301 | 3.2155284  |
| O | 0.8656434  | -1.4459747 | 0.3872307  |
| O | 2.2162128  | -1.3671368 | -2.1676202 |
| O | -0.3089893 | -0.0672337 | -1.6293703 |
| O | -0.1495403 | 1.1832829  | 3.1056358  |
| O | -2.6939212 | -1.6508468 | -1.2295063 |
| O | 2.2154593  | -2.5980737 | 4.0454203  |
| O | 2.2524238  | 2.3436720  | 4.0815403  |
| W | 3.0298700  | 1.7655387  | -0.4995437 |
| O | -0.5174156 | -2.9507187 | -1.6582220 |
| O | 3.0847362  | 1.9983797  | 1.4076144  |
| W | 0.0747346  | -3.6616819 | 0.0194812  |
| O | -4.4173324 | -2.8317118 | 0.6971602  |
| O | 2.3715054  | -0.0652236 | -4.6879195 |
| W | 0.1288674  | 3.4969734  | 0.0713113  |
| O | 4.5123565  | -2.5766144 | -1.0136436 |
| O | 4.5494814  | 2.3592967  | -0.9781393 |
| W | -3.0599566 | 1.6500883  | 0.6664170  |
| O | -2.3329354 | 2.7423316  | -3.7622130 |
| O | -0.2353577 | -5.3269439 | -0.1278341 |
| O | 3.0527038  | -2.2272247 | 1.3769255  |
| O | -1.5360625 | 2.8099371  | 0.7245915  |
| O | -2.1882704 | -0.0407946 | -3.3151385 |
| W | -1.5430673 | -1.7627996 | -2.7571022 |

|    |            |            |            |
|----|------------|------------|------------|
| O  | 1.8845248  | -3.5277558 | -0.6129083 |
| W  | 3.0019115  | -1.9665098 | -0.5265209 |
| O  | 0.0540812  | -1.3791693 | -3.7555658 |
| O  | -1.9675110 | -0.1010707 | 4.8696889  |
| O  | -2.6696264 | 1.5465241  | -1.2066975 |
| O  | -3.9359086 | -0.0554878 | 0.5339522  |
| O  | -4.3753389 | 2.7251658  | 0.7365214  |
| O  | 0.8414889  | 3.3357609  | 1.8487181  |
| O  | -2.7872209 | -1.4022883 | 2.5031780  |
| W  | 1.5854763  | -1.9784323 | 2.5929809  |
| O  | 0.8863988  | 1.2642258  | 0.4069936  |
| O  | -0.4734810 | 2.8191753  | -1.6167067 |
| O  | -1.5797052 | -2.9593624 | 0.6831434  |
| As | 0.0031930  | -0.0812895 | 0.0008475  |
| W  | -3.0858068 | -1.7757672 | 0.6420367  |

**[SbW<sub>12</sub>O<sub>40</sub>]<sup>3-</sup>**

|   |            |            |            |
|---|------------|------------|------------|
| O | 0.0705833  | 1.2817442  | -3.7903349 |
| O | 1.9650403  | 3.3924733  | -0.5638499 |
| O | -0.1834458 | 5.1656738  | -0.0643435 |
| O | 0.8074559  | -3.5852251 | 1.8202570  |
| O | 2.0119532  | -0.1153896 | 2.6204307  |
| O | 3.2979099  | -0.1045882 | -0.2106976 |
| W | -1.5141377 | 1.6523410  | -2.7509049 |
| O | -0.1780032 | -1.3838162 | 3.0301256  |
| W | 1.3680823  | -0.0680469 | -3.3178123 |
| O | 2.1854379  | 1.1989516  | -2.1178269 |
| O | -2.3847167 | -2.8344224 | -3.7798720 |
| O | -1.5660517 | -0.0759788 | 0.9186266  |
| W | 1.6229486  | 1.7716871  | 2.6125440  |
| O | -2.8096645 | 1.2588486  | 2.5554073  |
| W | -1.5964900 | -0.0918805 | 3.2131289  |
| O | 0.9478822  | -1.5759441 | 0.4241065  |
| O | 2.1665718  | -1.3634221 | -2.1361345 |
| O | -0.3394387 | -0.0657872 | -1.7847651 |
| O | -0.1584544 | 1.1800597  | 3.0484126  |
| O | -2.6602241 | -1.6065474 | -1.2141031 |
| O | 2.2047421  | -2.5754467 | 4.0636510  |
| O | 2.2417955  | 2.3199592  | 4.0993526  |
| W | 3.0299337  | 1.7830356  | -0.4874218 |
| O | -0.4895705 | -2.9021007 | -1.6415631 |
| O | 3.1236769  | 2.0326657  | 1.4254455  |
| W | 0.0935535  | -3.6683542 | 0.0273746  |
| O | -4.4046348 | -2.8528971 | 0.6757373  |
| O | 2.3979268  | -0.0658903 | -4.6720343 |
| W | 0.1478637  | 3.5032421  | 0.0796005  |
| O | 4.5187870  | -2.5529469 | -1.0323090 |
| O | 4.5557877  | 2.3360189  | -0.9972127 |
| W | -3.0713309 | 1.6392161  | 0.6802050  |
| O | -2.3411793 | 2.7624750  | -3.7398768 |

|    |            |            |            |
|----|------------|------------|------------|
| O  | -0.2628857 | -5.3233043 | -0.1410288 |
| O  | 3.0912175  | -2.2623664 | 1.3945242  |
| O  | -1.5054769 | 2.7607650  | 0.7339704  |
| O  | -2.2131912 | -0.0402430 | -3.3651237 |
| W  | -1.5406035 | -1.7514732 | -2.7753443 |
| O  | 1.9123371  | -3.5755944 | -0.6142363 |
| W  | 3.0016584  | -1.9839734 | -0.5141210 |
| O  | 0.0503741  | -1.3911423 | -3.8092353 |
| O  | -1.9394348 | -0.1009983 | 4.8792923  |
| O  | -2.6366033 | 1.5012654  | -1.1921028 |
| O  | -3.9888804 | -0.0551341 | 0.5486922  |
| O  | -4.3623322 | 2.7465990  | 0.7153737  |
| O  | 0.8598293  | 3.3832578  | 1.8706547  |
| O  | -2.8298119 | -1.4148816 | 2.5363330  |
| W  | 1.5938263  | -1.9963393 | 2.5853295  |
| O  | 0.9705856  | 1.3925890  | 0.4456796  |
| O  | -0.4465166 | 2.7703659  | -1.6009741 |
| O  | -1.5482510 | -2.9107077 | 0.6936150  |
| Sb | 0.0032607  | -0.0811744 | 0.0007145  |
| W  | -3.0968468 | -1.7649337 | 0.6562241  |

**[PW<sub>6</sub>O<sub>24</sub>]<sup>7-</sup>**

|   |            |            |            |
|---|------------|------------|------------|
| W | -2.5642135 | 1.8624505  | 0.5788947  |
| W | -1.1661264 | 0.2528285  | 2.9937854  |
| W | 1.4026744  | -1.6043733 | 2.4146774  |
| P | 0.0000025  | 0.0000032  | -0.0000007 |
| O | 0.4862797  | 1.0788202  | -1.3119471 |
| O | -1.6256614 | 0.2269160  | -0.6511742 |
| O | -0.4603788 | 1.2852405  | 1.1224108  |
| O | -2.7799127 | 0.5536540  | 1.9809031  |
| O | -2.6682600 | 3.3334332  | 1.5525228  |
| O | -1.8205720 | 2.7827351  | -0.9444943 |
| O | -4.2240308 | 1.6717523  | 0.0035534  |
| O | 0.6902517  | -0.0975132 | 3.3866840  |
| O | -1.9046384 | -0.9961274 | 4.0025504  |
| O | -1.2297680 | 1.6733150  | 4.0431469  |
| O | 3.0275070  | -1.4002444 | 3.0781576  |
| O | 0.7488619  | -2.9102939 | 3.4100881  |
| W | 2.5642029  | -1.8624562 | -0.5788990 |
| W | 1.1661212  | -0.2528254 | -2.9937827 |
| W | -1.4026793 | 1.6043687  | -2.4146789 |
| O | -0.4862777 | -1.0788179 | 1.3119487  |
| O | 1.6256639  | -0.2269128 | 0.6511760  |
| O | 0.4603807  | -1.2852384 | -1.1224090 |
| O | 2.7799142  | -0.5536623 | -1.9809081 |
| O | 2.6682705  | -3.3334360 | -1.5525178 |
| O | 1.8205646  | -2.7827345 | 0.9444913  |
| O | 4.2240331  | -1.6717451 | -0.0035439 |
| O | -0.6902541 | 0.0975072  | -3.3866785 |
| O | 1.9046332  | 0.9961308  | -4.0025451 |

|   |            |            |            |
|---|------------|------------|------------|
| O | 1.2297673  | -1.6733165 | -4.0431586 |
| O | -3.0275034 | 1.4002503  | -3.0781668 |
| O | -0.7488522 | 2.9102916  | -3.4100859 |

**[AsW<sub>6</sub>O<sub>24</sub>]<sup>7-</sup>**

|    |            |            |            |
|----|------------|------------|------------|
| W  | -2.6072618 | 1.8933051  | 0.5883779  |
| W  | -1.1854723 | 0.2571272  | 3.0435140  |
| W  | 1.4264009  | -1.6310755 | 2.4552163  |
| As | -0.0000024 | -0.0000008 | -0.0000023 |
| O  | 0.4985775  | 1.1284192  | -1.4157871 |
| O  | -1.7230644 | 0.2742504  | -0.6928073 |
| O  | -0.5178673 | 1.3498238  | 1.1990688  |
| O  | -2.7898350 | 0.5875205  | 2.0091586  |
| O  | -2.7090798 | 3.3797698  | 1.5369462  |
| O  | -1.8629577 | 2.7860395  | -0.9612160 |
| O  | -4.2738828 | 1.6918663  | 0.0393533  |
| O  | 0.6766661  | -0.1264079 | 3.4189719  |
| O  | -1.9506556 | -0.9808849 | 4.0444663  |
| O  | -1.2249319 | 1.6669646  | 4.1069984  |
| O  | 3.0389675  | -1.4114646 | 3.1412645  |
| O  | 0.7877288  | -2.9562059 | 3.4332953  |
| W  | 2.6072593  | -1.8933045 | -0.5883816 |
| W  | 1.1854731  | -0.2571189 | -3.0435108 |
| W  | -1.4264035 | 1.6310732  | -2.4552126 |
| O  | -0.4985798 | -1.1284223 | 1.4157870  |
| O  | 1.7230621  | -0.2742532 | 0.6928058  |
| O  | 0.5178654  | -1.3498272 | -1.1990708 |
| O  | 2.7898311  | -0.5875228 | -2.0091574 |
| O  | 2.7090901  | -3.3797688 | -1.5369432 |
| O  | 1.8629588  | -2.7860437 | 0.9612172  |
| O  | 4.2738830  | -1.6918562 | -0.0393479 |
| O  | -0.6766683 | 0.1264055  | -3.4189767 |
| O  | 1.9506539  | 0.9808829  | -4.0444616 |
| O  | 1.2249341  | -1.6669703 | -4.1070067 |
| O  | -3.0389673 | 1.4114717  | -3.1412691 |
| O  | -0.7877217 | 2.9562080  | -3.4332906 |

**[SbW<sub>6</sub>O<sub>24</sub>]<sup>7-</sup>**

|    |            |            |            |
|----|------------|------------|------------|
| W  | -2.6603678 | 1.9295856  | 0.5997888  |
| W  | -1.2076726 | 0.2629022  | 3.1037244  |
| W  | 1.4547019  | -1.6644997 | 2.5041242  |
| Sb | 0.0000035  | 0.0000033  | 0.0000017  |
| O  | 0.5129583  | 1.1869677  | -1.5390145 |
| O  | -1.8384483 | 0.3308736  | -0.7423150 |
| O  | -0.5865763 | 1.4260938  | 1.2899597  |
| O  | -2.8043977 | 0.6231736  | 2.0418735  |
| O  | -2.7632423 | 3.4343821  | 1.5158925  |
| O  | -1.9102053 | 2.7939711  | -0.9797799 |
| O  | -4.3347058 | 1.7162932  | 0.0844686  |

|   |            |            |            |
|---|------------|------------|------------|
| O | 0.6647736  | -0.1563410 | 3.4571485  |
| O | -2.0052820 | -0.9582719 | 4.0973006  |
| O | -1.2177835 | 1.6576219  | 4.1851224  |
| O | 3.0501178  | -1.4296264 | 3.2207661  |
| O | 0.8350606  | -3.0115776 | 3.4612700  |
| W | 2.6603705  | -1.9295727 | -0.5997801 |
| W | 1.2076768  | -0.2628901 | -3.1037234 |
| W | -1.4547014 | 1.6645068  | -2.5041299 |
| O | -0.5129588 | -1.1869705 | 1.5390157  |
| O | 1.8384451  | -0.3308741 | 0.7423129  |
| O | 0.5865775  | -1.4260973 | -1.2899613 |
| O | 2.8043965  | -0.6231765 | -2.0418747 |
| O | 2.7632457  | -3.4343905 | -1.5158974 |
| O | 1.9102055  | -2.7939706 | 0.9797795  |
| O | 4.3347034  | -1.7162922 | -0.0844697 |
| O | -0.6647763 | 0.1563376  | -3.4571491 |
| O | 2.0052799  | 0.9582651  | -4.0972998 |
| O | 1.2177811  | -1.6576285 | -4.1851229 |
| O | -3.0501182 | 1.4296289  | -3.2207656 |
| O | -0.8350613 | 3.0115731  | -3.4612658 |

**[W<sub>12</sub>O<sub>40</sub>]<sup>8-</sup>**

|   |            |            |            |
|---|------------|------------|------------|
| O | 12.1265246 | -0.3516175 | 10.4116112 |
| W | 12.2662838 | 1.4098398  | 10.3401221 |
| O | 12.5128166 | 1.9261788  | 12.0118213 |
| O | 13.7058062 | 1.8432677  | 9.3307641  |
| O | 10.7708477 | 2.1384711  | 9.6673147  |
| W | 9.1278942  | 3.0194176  | 8.6099511  |
| O | 8.7513919  | 3.9709815  | 10.0109019 |
| O | 8.1745098  | 1.5911181  | 8.9074635  |
| O | 8.0220473  | 3.8320920  | 7.3329958  |
| W | 14.8162275 | 3.0239115  | 7.9926917  |
| O | 15.5354086 | 1.5881206  | 7.2975151  |
| O | 15.9974691 | 3.4405439  | 9.2064569  |
| O | 15.2566800 | 4.2929169  | 6.6911189  |
| O | 13.3595189 | 4.3955197  | 8.5725299  |
| O | 10.1552336 | 2.0156435  | 6.9809919  |
| W | 11.4433332 | 2.2754569  | 5.7514632  |
| O | 11.5717734 | 0.7929265  | 4.8208609  |
| O | 12.9918809 | 2.5769052  | 6.5769842  |
| W | 12.1283418 | 5.5623354  | 7.8894707  |
| O | 10.6971270 | 4.4716057  | 8.0219960  |
| W | 14.8875554 | 5.6467887  | 5.3068240  |
| O | 15.5463565 | 4.6078192  | 4.0711863  |
| O | 16.1405662 | 6.7863072  | 5.7184602  |
| O | 12.1786585 | 6.7672091  | 9.1356311  |
| O | 10.8789552 | 6.8971386  | 6.7110601  |
| W | 10.4497283 | 8.2549919  | 5.6088011  |
| O | 10.3213594 | 9.7374967  | 6.5393263  |
| O | 8.9011904  | 7.9535496  | 4.7832208  |

|   |            |            |            |
|---|------------|------------|------------|
| O | 11.7378382 | 8.5146876  | 4.3792106  |
| O | 11.0141271 | 3.6332689  | 4.6491400  |
| W | 9.7646636  | 4.9680674  | 3.4707959  |
| O | 11.1959792 | 6.0587816  | 3.3381853  |
| O | 8.5335524  | 6.1349013  | 2.7876935  |
| W | 7.0055260  | 4.8836330  | 6.0534155  |
| O | 6.3467336  | 5.9226356  | 7.2891423  |
| O | 5.7524234  | 3.7441641  | 5.6418268  |
| O | 9.7144011  | 3.7631864  | 2.2245743  |
| O | 6.6363600  | 6.2375478  | 4.6691628  |
| W | 7.0768531  | 7.5064900  | 3.3675413  |
| O | 6.3576635  | 8.9423634  | 4.0627574  |
| O | 5.8955789  | 7.0899268  | 2.1538214  |
| O | 8.1872604  | 8.6871706  | 2.0294759  |
| W | 9.6267653  | 9.1204964  | 1.0200642  |
| O | 9.3802033  | 8.6040639  | -0.6515975 |
| O | 9.7665784  | 10.8819335 | 0.9484840  |
| O | 11.1222163 | 8.3918437  | 1.6928954  |
| W | 12.7651909 | 7.5109596  | 2.7502540  |
| O | 13.1416670 | 6.5593279  | 1.3493418  |
| O | 13.7185212 | 8.9391866  | 2.4527277  |
| O | 13.8709812 | 6.6982611  | 4.0272283  |
| O | 13.2582475 | 5.8565484  | 6.4056831  |
| O | 8.6348215  | 4.6738456  | 4.954551   |

**[P<sub>4</sub>W<sub>14</sub>O<sub>58</sub>]<sup>12-</sup>**

|   |            |            |            |
|---|------------|------------|------------|
| W | 0.3091449  | 11.3546128 | 11.0651599 |
| W | -1.7772762 | 8.5723107  | 9.4859791  |
| W | -2.6172761 | 5.9395698  | 11.5782687 |
| W | -1.3326914 | 6.1828201  | 15.1663936 |
| W | 2.1877367  | 6.1994594  | 13.8404375 |
| W | 1.0177845  | 6.2346844  | 10.5369641 |
| W | 3.0249205  | 8.8420708  | 11.7434657 |
| P | -0.4965097 | 8.4848994  | 12.7638126 |
| P | 2.5557275  | 11.6291350 | 13.6548606 |
| O | -0.2892002 | 9.9885931  | 12.6280276 |
| O | -1.6093626 | 8.0320309  | 11.7465102 |
| O | -0.9050447 | 8.0487755  | 14.1658865 |
| O | 0.8360420  | 7.7527575  | 12.3739535 |
| O | -0.7277795 | 10.0887881 | 9.9878907  |
| O | -2.4706649 | 6.7738246  | 9.8153794  |
| O | -2.1000002 | 5.7749050  | 13.4105484 |
| O | 0.5302940  | 5.6829378  | 14.3598205 |
| O | 3.3499972  | 7.5601683  | 13.1392228 |
| O | 2.0371044  | 5.4614120  | 12.1296308 |
| O | 2.6658370  | 7.4435419  | 10.5569781 |
| O | 1.9029264  | 10.0090897 | 10.9293268 |
| O | 0.1298822  | 7.4891189  | 9.5839875  |
| O | -0.5057033 | 5.4932684  | 11.1684572 |
| O | 2.9103566  | 10.1610327 | 13.3423313 |

|   |            |            |            |
|---|------------|------------|------------|
| O | 1.6543677  | 12.1389223 | 12.4817900 |
| O | 3.8819536  | 12.4508993 | 13.7727393 |
| O | 1.7925110  | 11.8164563 | 14.9820487 |
| O | 0.9485955  | 12.2518157 | 9.6932003  |
| O | -0.9694022 | 12.4496064 | 11.5300881 |
| O | -1.6533979 | 8.5394226  | 7.7175228  |
| O | -3.3436086 | 9.3611547  | 9.6249091  |
| O | -3.0172653 | 4.2787073  | 11.1031072 |
| O | -4.2473490 | 6.5259774  | 11.8833135 |
| O | -1.4958372 | 4.5489223  | 15.7982119 |
| O | -2.7289503 | 6.9061989  | 15.9257729 |
| O | 3.2623182  | 5.0118456  | 14.5134167 |
| O | 1.5786849  | 5.0824831  | 9.3103117  |
| O | 4.6060354  | 9.2515613  | 11.1511071 |
| W | 3.5523095  | 7.9597260  | 19.3729461 |
| W | 5.6387252  | 10.7420301 | 20.9521262 |
| W | 6.4787250  | 13.3747695 | 18.8598364 |
| W | 5.1941462  | 13.1315166 | 15.2717109 |
| W | 1.6737191  | 13.1148770 | 16.5976673 |
| W | 2.8436761  | 13.0796456 | 19.9011410 |
| W | 0.8365306  | 10.4722607 | 18.6946473 |
| P | 4.3579636  | 10.8294340 | 17.6742913 |
| P | 1.3057301  | 7.6852023  | 16.7832457 |
| O | 4.1506504  | 9.3257362  | 17.8100750 |
| O | 5.4708185  | 11.2823026 | 18.6915951 |
| O | 4.7664994  | 11.2655600 | 16.2722251 |
| O | 3.0254165  | 11.5615818 | 18.0641511 |
| O | 4.5892350  | 9.2255485  | 20.4502116 |
| O | 6.3321243  | 12.5405134 | 20.6227265 |
| O | 5.9614582  | 13.5394340 | 17.0275568 |
| O | 3.3311586  | 13.6313982 | 16.0782810 |
| O | 0.5114568  | 11.7541665 | 17.2988827 |
| O | 1.8243481  | 13.8529267 | 18.3084760 |
| O | 1.1956207  | 11.8707930 | 19.8811260 |
| O | 1.9585279  | 9.3052464  | 19.5087812 |
| O | 3.7315713  | 11.8252160 | 20.8541162 |
| O | 4.3671580  | 13.8210704 | 19.2696524 |
| O | 0.9510992  | 9.1533017  | 17.0957732 |
| O | 2.2070851  | 7.1754091  | 17.9563138 |
| O | -0.0205006 | 6.8634366  | 16.6653658 |
| O | 2.0689472  | 7.4978765  | 15.4560561 |
| O | 2.9128623  | 7.0625166  | 20.7449118 |
| O | 4.8308628  | 6.8647265  | 18.9080176 |
| O | 5.5148556  | 10.7749077 | 22.7205786 |
| O | 7.2050712  | 9.9531716  | 20.8131890 |
| O | 6.8787262  | 15.0356252 | 19.3349999 |
| O | 8.1088075  | 12.7883535 | 18.5547925 |
| O | 5.3572922  | 14.7654064 | 14.6398903 |
| O | 6.5904014  | 12.4081316 | 14.5123296 |
| O | 0.5991366  | 14.3024814 | 15.9246931 |
| O | 2.2827664  | 14.2318503 | 21.1277988 |

O -0.7445745 10.0627724 19.2869992

**Na<sub>6</sub>[As<sub>2</sub>W<sub>18</sub>O<sub>68</sub>]<sup>12-</sup>**

|    |            |            |            |
|----|------------|------------|------------|
| W  | 5.3694087  | 2.8978017  | 27.1859223 |
| W  | 8.1362933  | 3.0249838  | 24.6299776 |
| As | 5.4585870  | 5.4584433  | 24.6267997 |
| Na | 10.1872027 | 6.2101165  | 23.8767409 |
| O  | 4.4783565  | 4.4774969  | 25.6068975 |
| O  | 5.1155477  | 5.1156660  | 23.0202568 |
| O  | 6.5806015  | 2.4365313  | 25.8449911 |
| O  | 3.9359408  | 2.0572912  | 26.1491479 |
| O  | 9.1791569  | 4.0274575  | 23.5762072 |
| O  | 8.8023667  | 3.8146744  | 26.2705352 |
| O  | 6.8486249  | 2.7543774  | 23.2367061 |
| O  | 5.6104386  | 1.6625829  | 28.4204770 |
| O  | 8.9958939  | 1.4965592  | 24.6564109 |
| O  | 5.1150025  | 7.0646870  | 24.9704644 |
| O  | 7.0650903  | 5.1155400  | 24.9699508 |
| W  | 2.8993212  | 2.8979548  | 24.7156534 |
| W  | 3.0245628  | 5.4548755  | 21.9495837 |
| Na | 6.2090002  | 6.2104021  | 19.8983023 |
| O  | 2.4370808  | 4.2390387  | 23.5049965 |
| O  | 2.0585379  | 3.9338060  | 26.1496316 |
| O  | 4.0262764  | 6.5095098  | 20.9068665 |
| O  | 3.8149973  | 3.8149632  | 21.2828172 |
| O  | 2.7534637  | 6.8475636  | 23.2377683 |
| O  | 1.6647124  | 1.6628175  | 24.4744591 |
| O  | 1.4959754  | 5.4279279  | 21.0902688 |
| Na | 6.2080016  | 10.1874280 | 23.8778016 |
| O  | 3.9354343  | 3.9336967  | 28.0266542 |
| O  | 6.5079901  | 9.1784153  | 26.0601024 |
| O  | 3.8136647  | 8.8010316  | 26.2718121 |
| O  | 6.8475148  | 6.8473222  | 27.3321198 |
| W  | 3.0238564  | 8.1350075  | 24.6312923 |
| O  | 2.4364462  | 6.5787251  | 25.8460703 |
| O  | 4.0255924  | 9.1785668  | 23.5775263 |
| O  | 1.4950531  | 8.9939126  | 24.6583238 |
| W  | 5.4554614  | 3.0251422  | 21.9489571 |
| O  | 4.2403107  | 2.4366720  | 23.5045287 |
| O  | 6.5093598  | 4.0276097  | 20.9062167 |
| O  | 5.4290007  | 1.4967577  | 21.0892656 |
| W  | 8.1356397  | 5.4545777  | 27.0610220 |
| Na | 8.8332169  | 4.8562685  | 21.2523143 |
| Na | 8.8322110  | 8.8332686  | 25.2318414 |
| Na | 4.8540064  | 8.8335715  | 21.2534104 |
| O  | 6.5801138  | 4.2387923  | 27.6483240 |
| O  | 11.0156080 | 5.8650932  | 21.5525062 |
| O  | 8.5319095  | 11.0160220 | 24.2239820 |
| O  | 5.8627065  | 8.5345489  | 19.0707459 |
| O  | 9.1784750  | 6.5092070  | 26.0594301 |



|    |            |            |            |   |            |            |            |
|----|------------|------------|------------|---|------------|------------|------------|
| O  | 5.8620746  | 11.0162479 | 21.5540254 | O | 10.8009234 | 12.6069969 | 21.6256904 |
| O  | 11.0149592 | 8.5340836  | 24.2232310 | O | 11.2262611 | 11.2286436 | 23.8473565 |
| O  | 8.5331739  | 5.8653251  | 19.0699763 | O | 8.1926080  | 12.2893158 | 21.8935424 |
| O  | 8.9948507  | 5.4274987  | 28.5896566 | O | 13.3765148 | 13.3808645 | 20.6557505 |
| W  | 2.8986397  | 5.3673955  | 27.1865633 | O | 9.6122869  | 13.5468641 | 24.0409921 |
| W  | 5.4540863  | 8.1348664  | 27.0616992 | O | 11.1057262 | 11.1101082 | 17.1035192 |
| O  | 4.2391765  | 6.5786188  | 27.6489271 | O | 6.2388216  | 11.2290963 | 18.8597090 |
| O  | 1.6636224  | 5.6074999  | 28.4215097 | O | 8.1936486  | 8.1964674  | 17.7980215 |
| O  | 5.4269947  | 8.9936869  | 28.5905486 | W | 6.9049231  | 12.0187452 | 20.5002776 |
| W  | 12.1425253 | 9.6763674  | 17.9435510 | O | 8.4605976  | 12.6072189 | 19.2852651 |
| W  | 12.0173298 | 6.9086961  | 20.4987498 | O | 6.0453241  | 13.5471764 | 20.4738941 |
| As | 9.5826150  | 9.5852619  | 20.5033484 | W | 12.0166719 | 9.5887488  | 23.1805336 |
| O  | 10.5628398 | 10.5662328 | 19.5232656 | O | 12.6041434 | 10.8046224 | 21.6251463 |
| O  | 9.9256795  | 9.9279975  | 22.1099004 | O | 13.5452681 | 9.6156517  | 24.0398294 |
| O  | 12.6047361 | 8.4650041  | 19.2840033 | W | 9.5870681  | 6.9089149  | 18.0683913 |
| O  | 12.9826511 | 11.1099332 | 18.9805150 | O | 10.8019786 | 8.4651678  | 17.4811708 |
| O  | 11.2275001 | 6.2427151  | 18.8582221 | O | 9.6141287  | 6.0501265  | 16.5395065 |
| O  | 12.2877455 | 8.1960925  | 21.8923030 | W | 9.6717719  | 12.1459779 | 17.9443004 |
| O  | 13.3775214 | 9.4363052  | 16.7085802 | W | 6.9055339  | 9.5892124  | 18.0691792 |
| O  | 13.5461382 | 6.0497777  | 20.4716705 | O | 8.4610550  | 10.8050099 | 17.4818819 |
| O  | 7.9761127  | 9.9281858  | 20.1602337 | O | 9.4307259  | 13.3812397 | 16.7097900 |
| O  | 9.9261903  | 7.9790277  | 20.1596369 | O | 6.0462991  | 9.6163334  | 16.5405459 |
| W  | 12.1419010 | 12.1457389 | 20.4145330 | O | 11.1052549 | 12.9864555 | 18.9810842 |
| W  | 9.5857953  | 12.0185115 | 23.1812610 |   |            |            |            |

### 3 Literature

- 1 T. Esser, M. Huber, D. Voß and J. Albert, Development of an efficient downstream process for product separation and catalyst recycling of a homogeneous polyoxometalate catalyst by means of nanofiltration membranes and design of experiments, *Chem. Eng. Res. Des.*, 2022, **185**, 37–50.
- 2 J.-C. Raabe, T. Esser, F. Jameel, M. Stein, J. Albert and M. J. Poller, Study on the incorporation of various elements into the Keggin lacunary-type phosphomolybdate [PMo<sub>9</sub>O<sub>34</sub>]<sup>9-</sup> and subsequent purification of the polyoxometalates by nanofiltration, *Inorg. Chem. Front.*, 2023, **10**, 4854–4868.
- 3 J.-C. Raabe, J. Albert and M. J. Poller, Spectroscopic, Crystallographic, and Electrochemical Study of Different Manganese(II)-Substituted Keggin-Type Phosphomolybdates, *Chem. – A Eur. J.*, 2022, **28**, 1–12.
- 4 J.-C. Raabe, J. Aceituno Cruz, J. Albert and M. J. Poller, Comparative Spectroscopic and Electrochemical Study of V(V)-Substituted Keggin-Type Phosphomolybdates and -Tungstates, *Inorganics*, 2023, **11**, 138.
- 5 F. Demartin, C. M. Gramaccioli and T. Pilati, The importance of accurate crystal structure determination of uranium minerals. II. Sod@Re (UO<sub>2</sub>)<sub>2</sub>(SiO<sub>4</sub>)<sub>2</sub>·2H<sub>2</sub>O, *Acta Crystallogr. Sect. C Cryst. Struct. Commun.*, 1992, **48**, 1–4.
- 6 R. C. Clark and J. S. Reid, The analytical calculation of absorption in multifaceted crystals, *Acta Crystallogr. Sect. A Found. Crystallogr.*, 1995, **51**, 887–897.
- 7 F. Kleemiss, O. V. Dolomanov, M. Bodensteiner, N. Peyerimhoff, L. Midgley, L. J. Bourhis, A. Genoni, L. A. Malaspina, D. Jayatilaka, J. L. Spencer, F. White, B. Grundkötter-Stock, S. Steinhauer, D. Lentz, H. Puschmann and S. Grabowsky, Accurate crystal structures and chemical properties from NoSpherA2, *Chem. Sci.*, 2021, **12**, 1675–1692.
- 8 S. C. Capelli, H.-B. Bürgi, B. Dittrich, S. Grabowsky and D. Jayatilaka, Hirshfeld atom refinement, *IUCrJ*, 2014, **1**, 361–379.
- 9 D. Jayatilaka and B. Dittrich, X-ray structure refinement using aspherical atomic density functions obtained from quantum-mechanical calculations, *Acta Crystallogr. Sect. A*

*Found. Crystallogr.*, 2008, **64**, 383–393.

- 10 L. Midgley, L. J. Bourhis, O. V. Dolomanov, S. Grabowsky, F. Kleemiss, H. Puschmann and N. Peyrerimhoff, Vanishing of the atomic form factor derivatives in non-spherical structural refinement – a key approximation scrutinized in the case of Hirshfeld atom refinement, *Acta Crystallogr. Sect. A Found. Adv.*, 2021, **77**, 519–533.
- 11 TURBOMOLE, V7.5.1 2021, a development of University of Karlsruhe and Forschungszentrum Karlsruhe GmbH, 1989–2007, TURBOMOLE GmbH, since 2007; available from <http://www.turbomole.com>.
- 12 M. Ernzerhof and G. E. Scuseria, Assessment of the Perdew–Burke–Ernzerhof exchange–correlation functional, *J. Chem. Phys.*, 1999, **110**, 5029–5036.
- 13 A. Schäfer, H. Horn and R. Ahlrichs, Fully optimized contracted Gaussian basis sets for atoms Li to Kr, *J. Chem. Phys.*, 1992, **97**, 2571–2577.
- 14 A. Klamt and G. Schüürmann, COSMO: a new approach to dielectric screening in solvents with explicit expressions for the screening energy and its gradient, *J. Chem. Soc., Perkin Trans. 2*, 1993, 799–805.
